# Supplementary material for: Genome-wide expression profiling of in vivo-derived bloodstream parasite stages and dynamic analysis of mRNA alterations during synchronous differentiation in Trypanosoma brucei
Source: PubMed Central journal article supplement (PMC2753553; doi:10.1186/1471-2164-10-427), 2009-09-11

**2-fold changes relative to T0,  
Chr. 1, 136 sig. genes, 16 "unchanging", 35 different profiles**

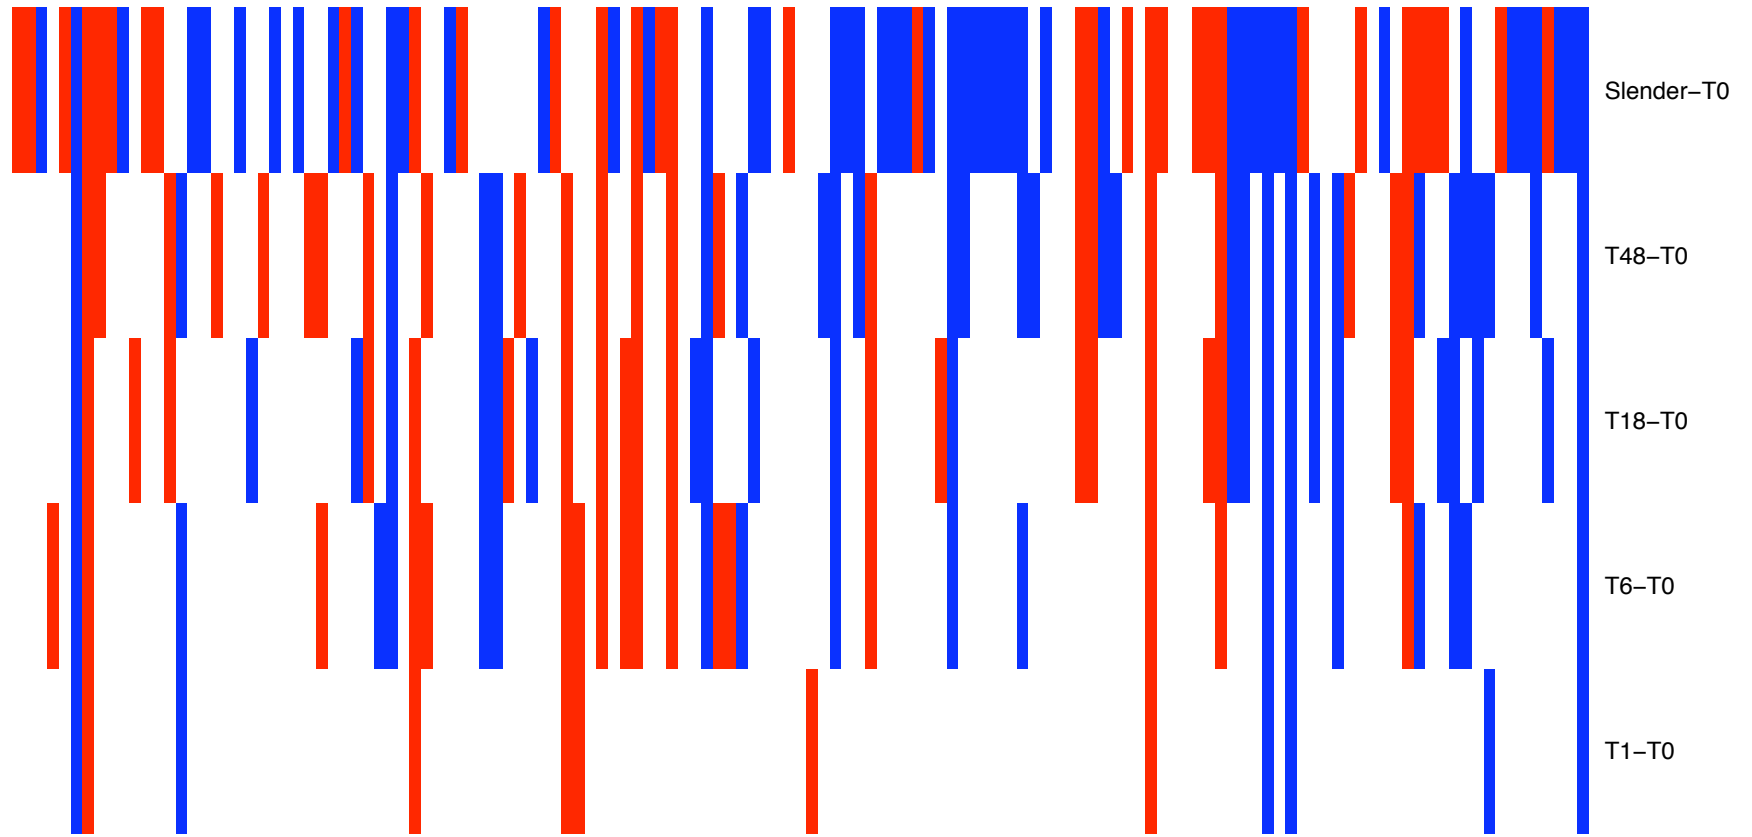

**2-fold changes relative to T0,  
Chr. 2, 69 sig. genes, 9 "unchanging", 22 different profiles**

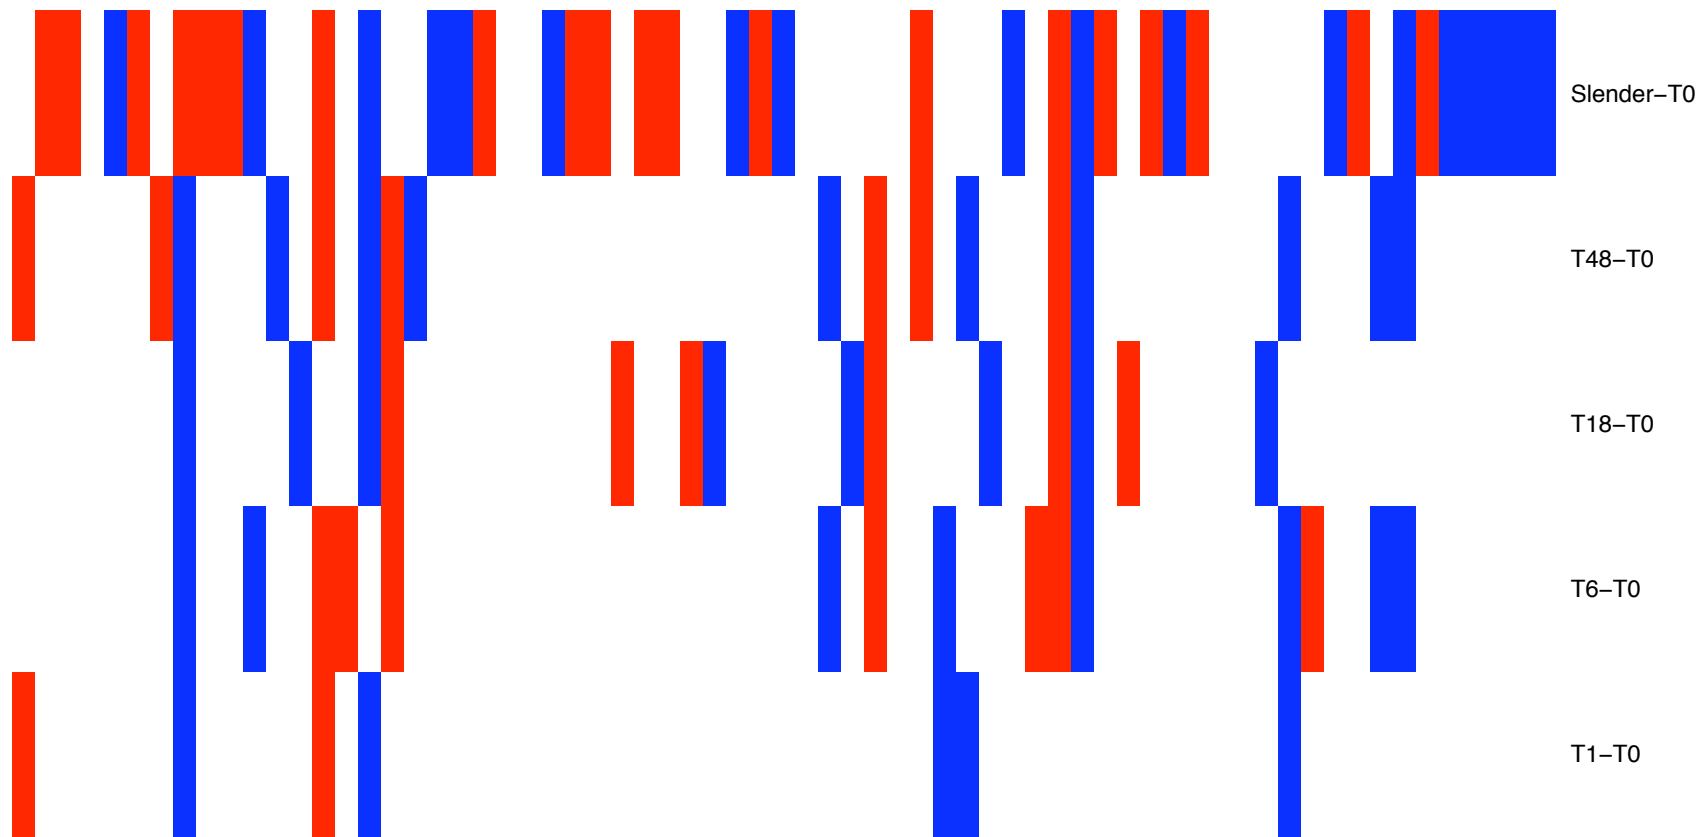

**2-fold changes relative to T0,  
Chr. 3, 102 sig. genes, 17 "unchanging", 31 different profiles**

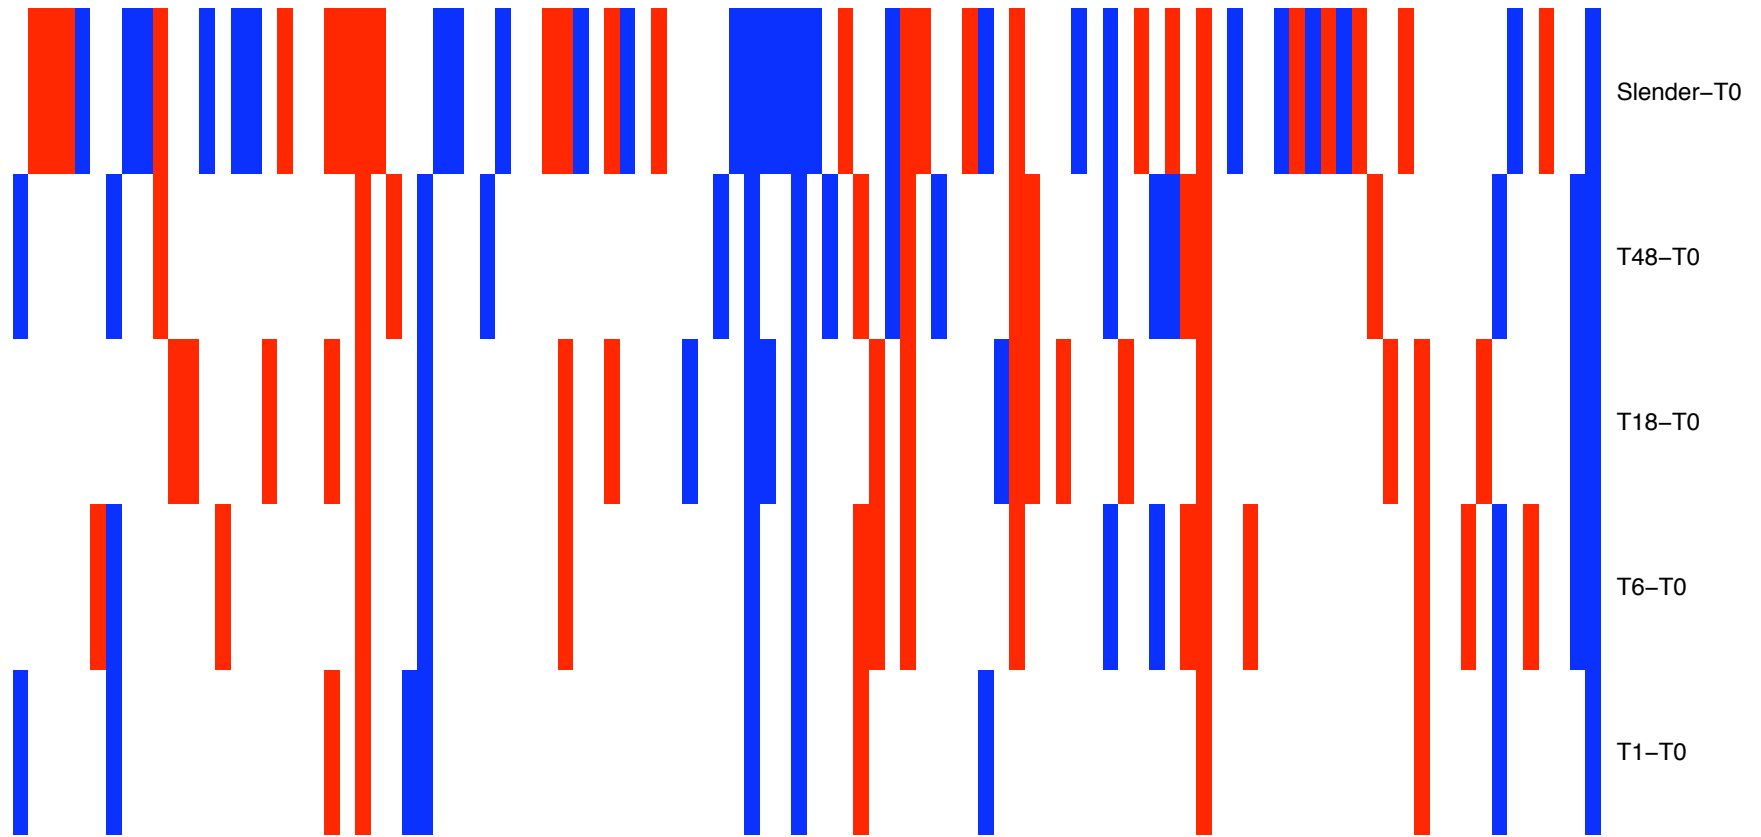

**2-fold changes relative to T0,  
Chr. 4, 118 sig. genes, 15 "unchanging", 31 different profiles**

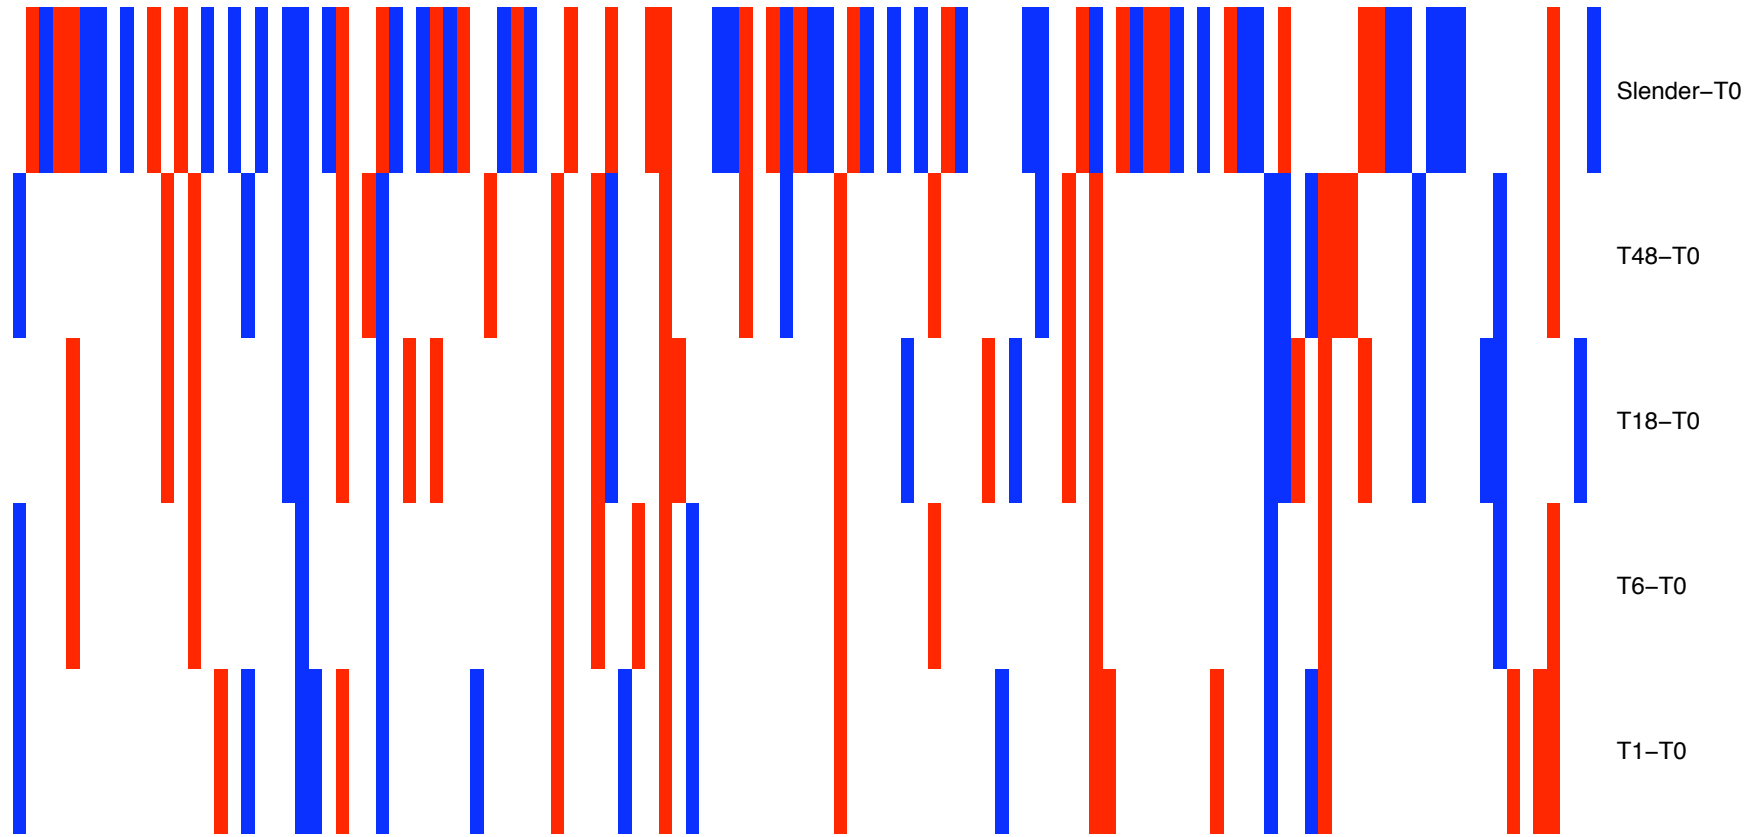

**2-fold changes relative to T0,  
Chr. 5, 90 sig. genes, 7 "unchanging", 26 different profiles**

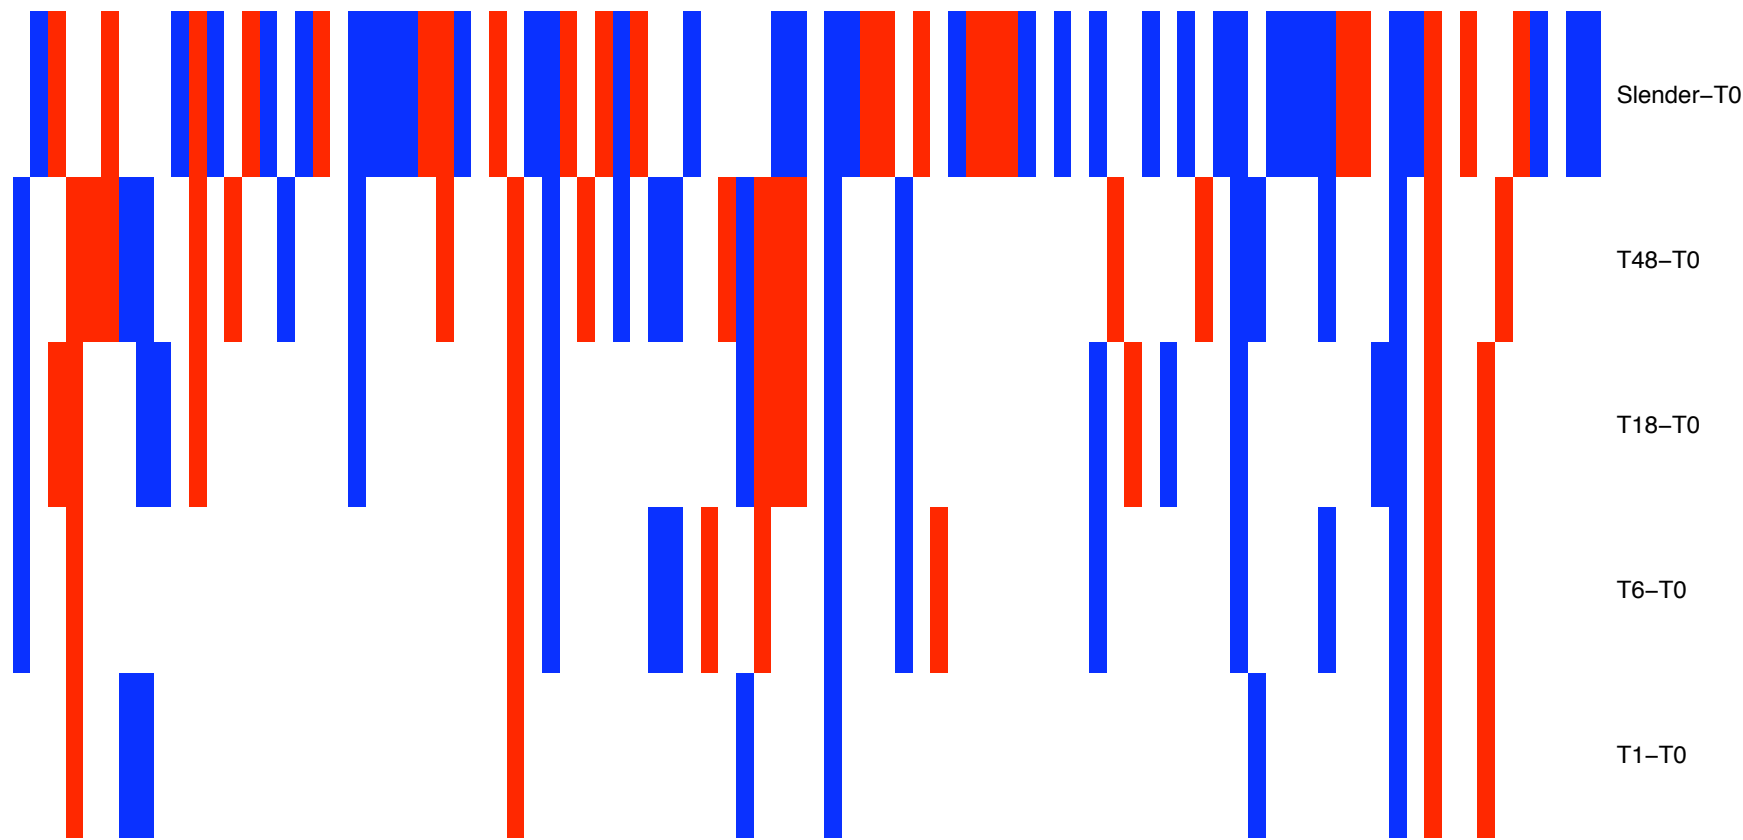

**2-fold changes relative to T0,  
Chr. 6, 105 sig. genes, 13 "unchanging", 26 different profiles**

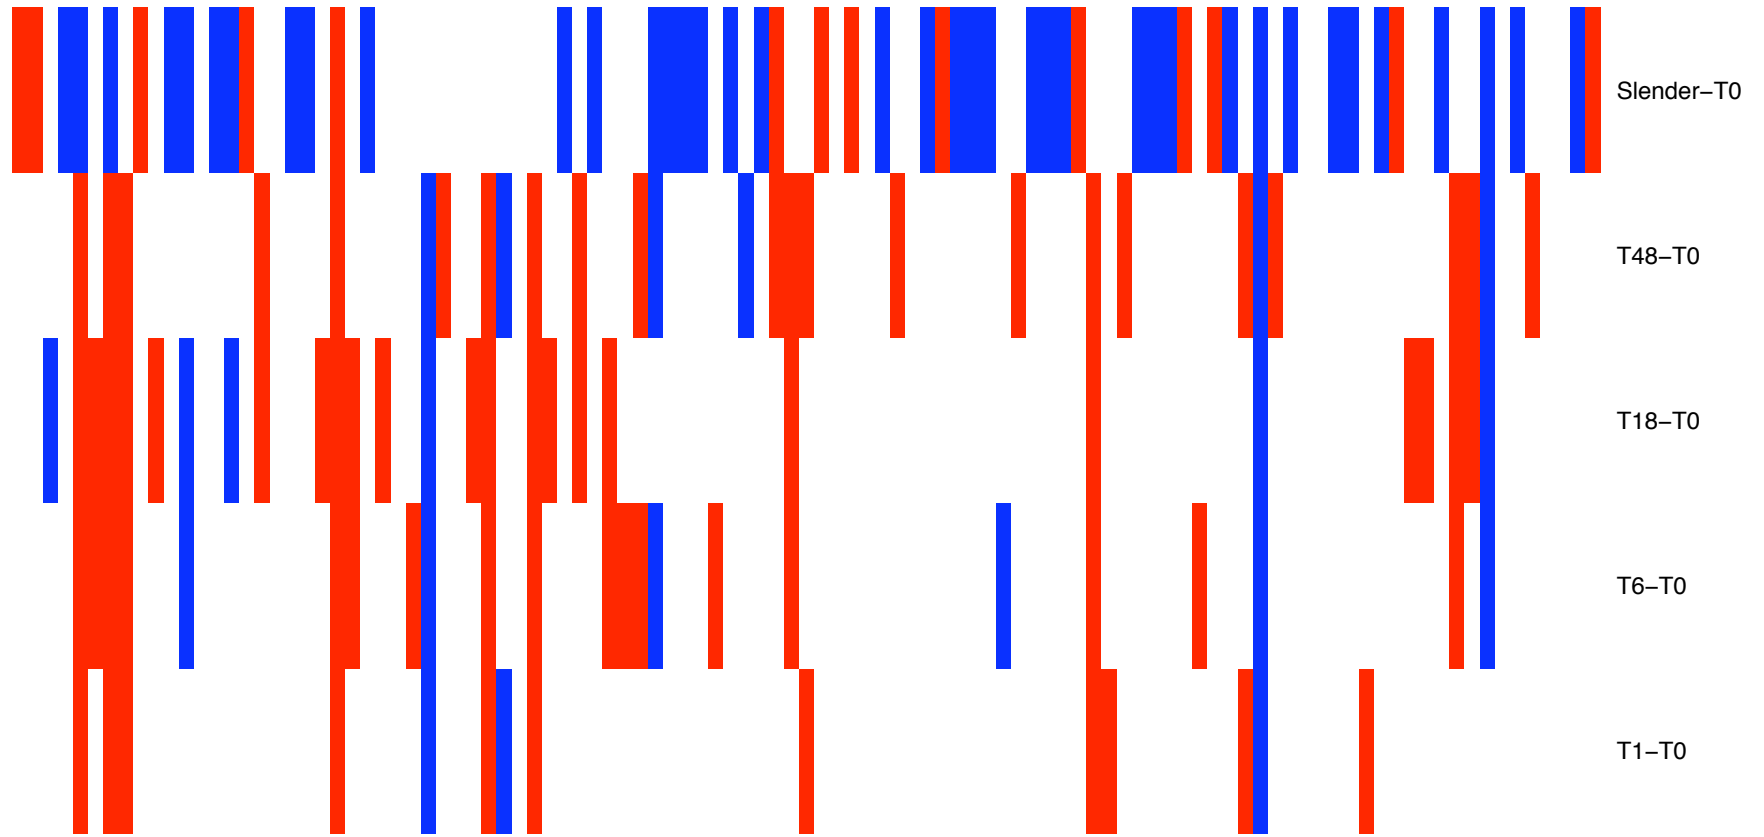

**2-fold changes relative to T0,  
Chr. 7, 183 sig. genes, 23 "unchanging", 33 different profiles**

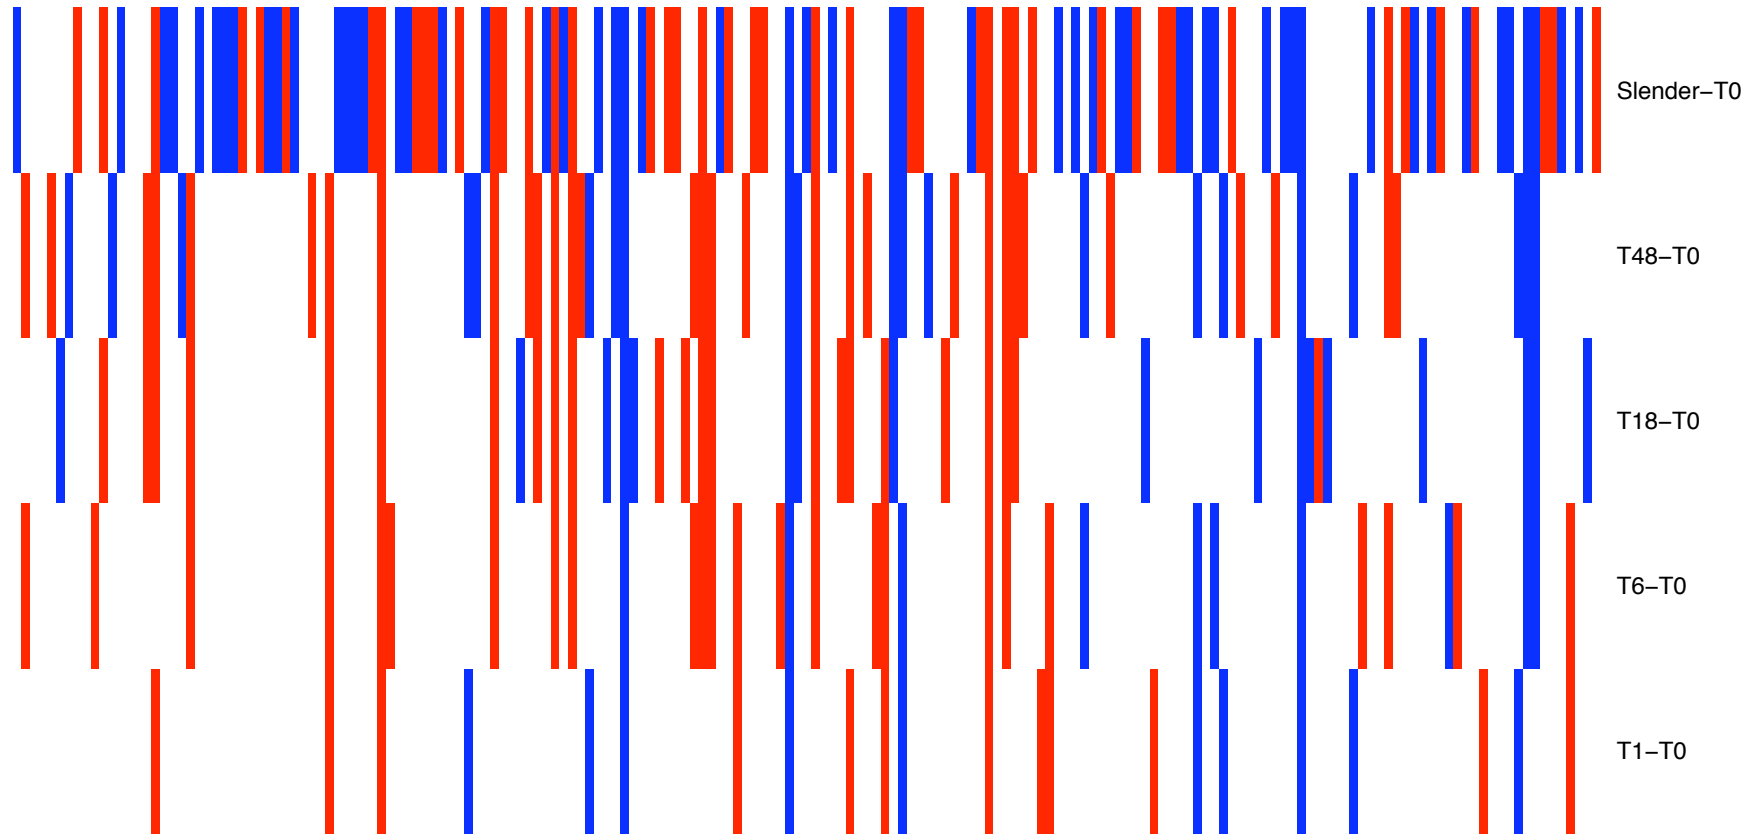

**2-fold changes relative to T0,  
Chr. 8, 176 sig. genes, 22 "unchanging", 36 different profiles**

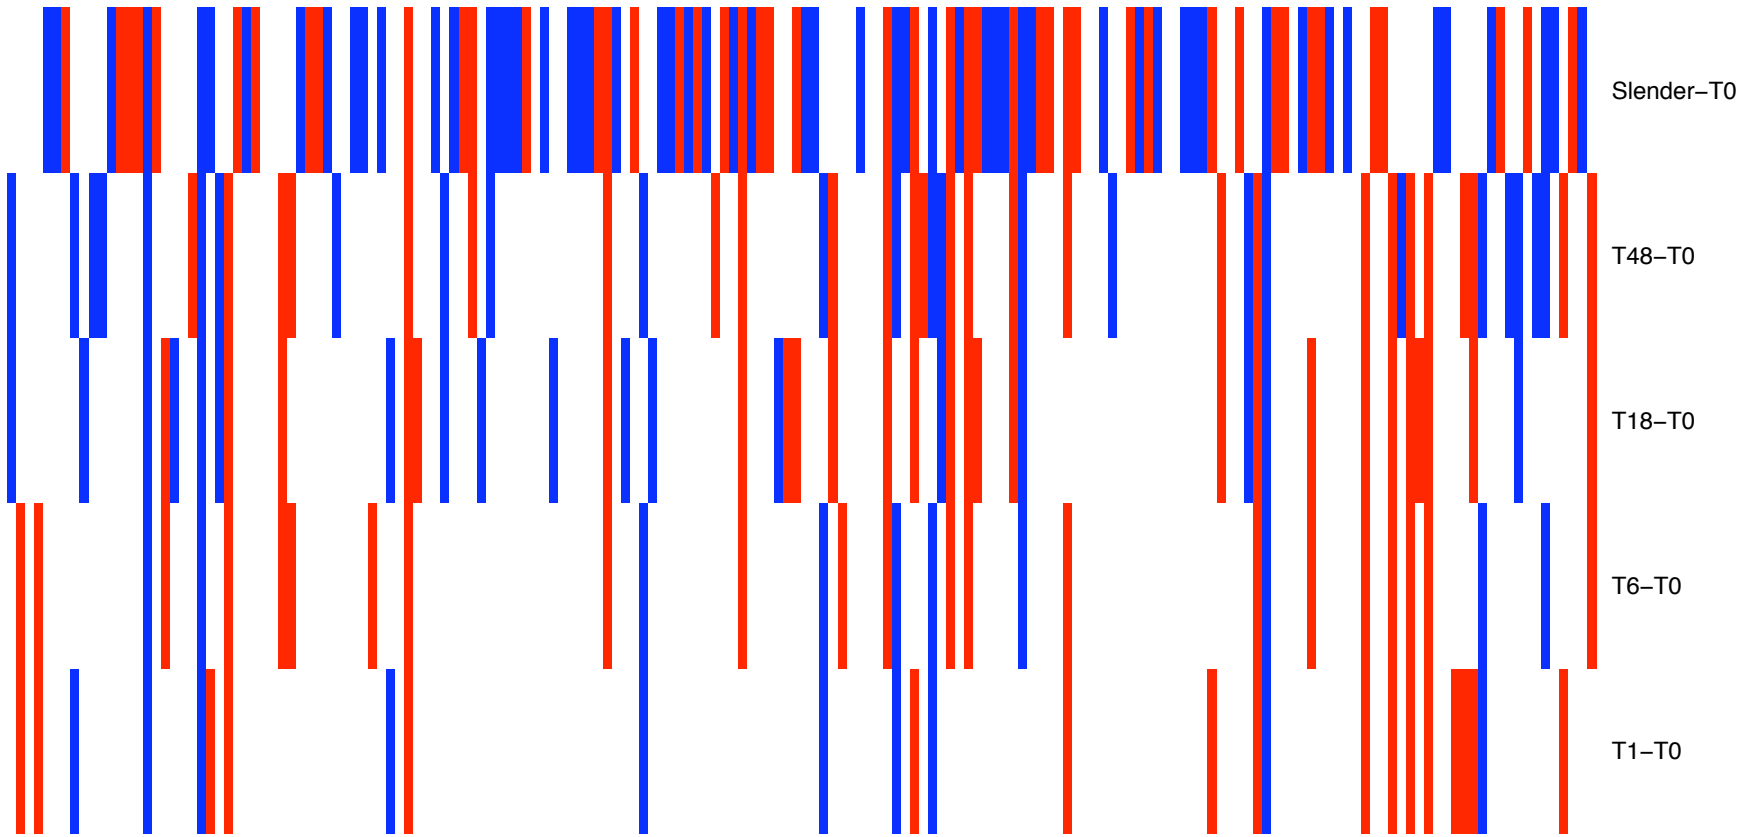



**2-fold changes relative to T0,  
Chr. 9, 347 sig. genes, 47 "unchanging", 50 different profiles**

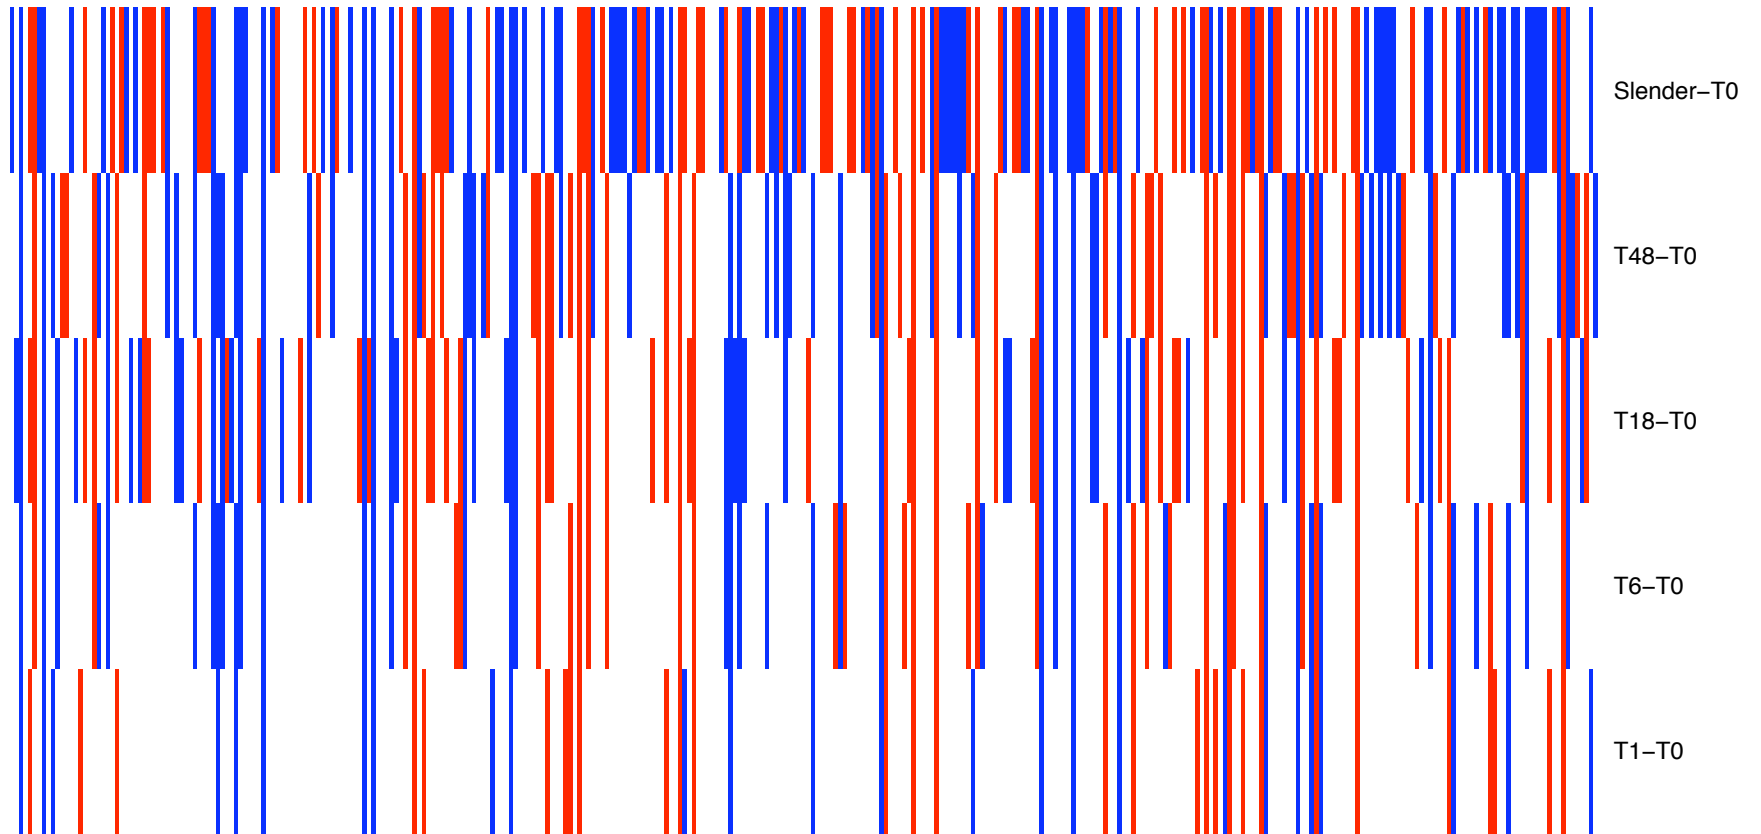

**2-fold changes relative to T0,  
Chr. 10, 369 sig. genes, 62 "unchanging", 43 different profiles**

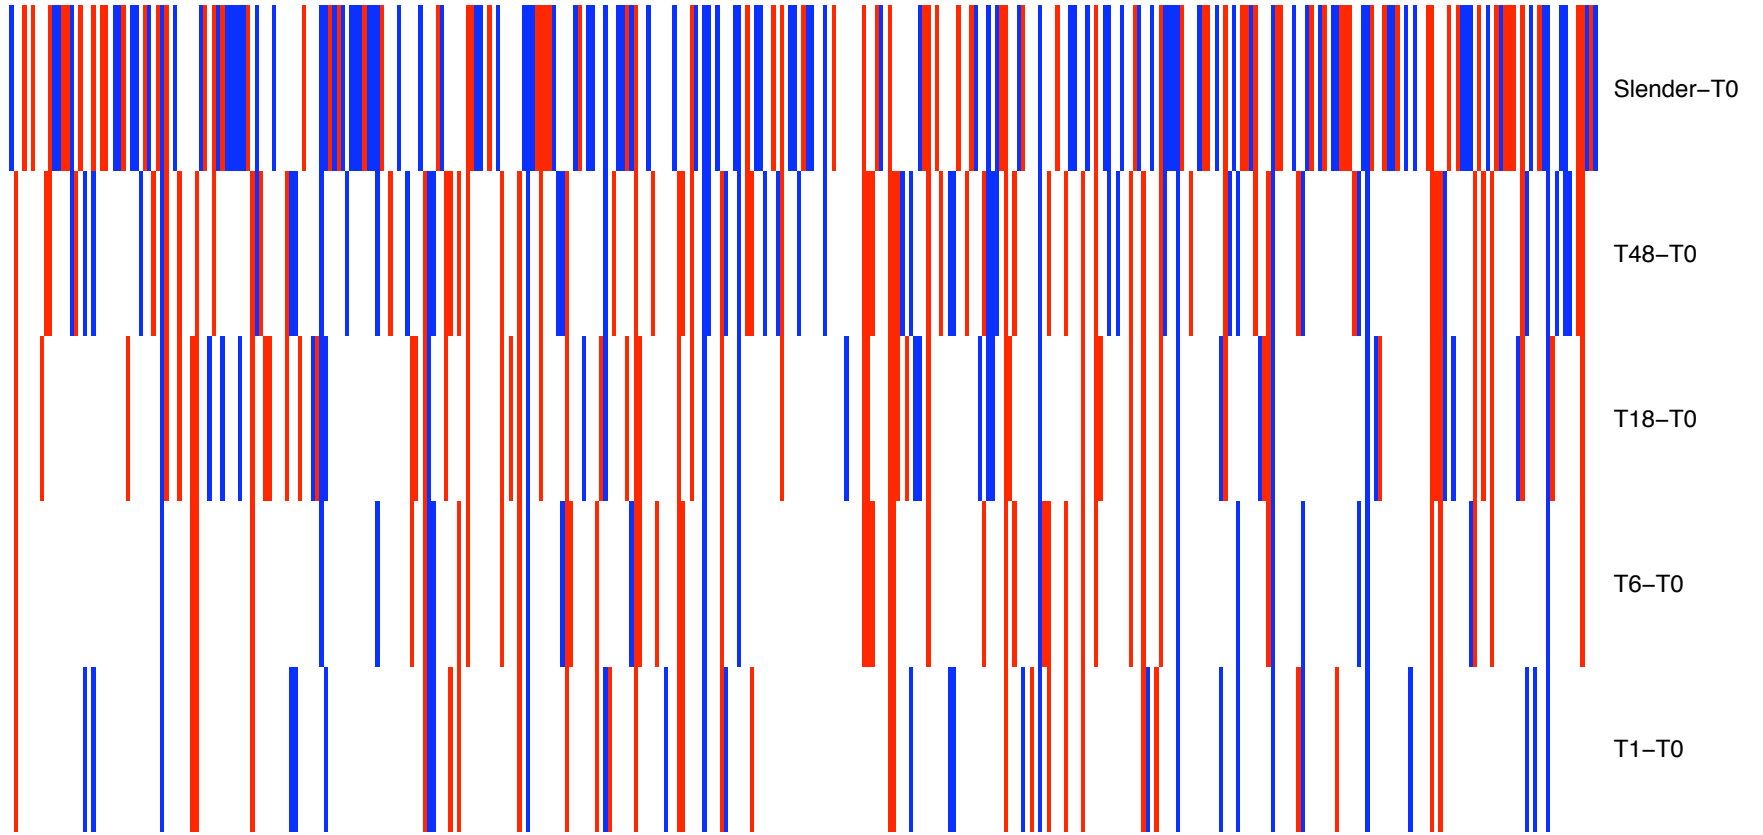

**2-fold changes relative to T0,  
Chr. 11, 385 sig. genes, 60 "unchanging", 48 different profiles**

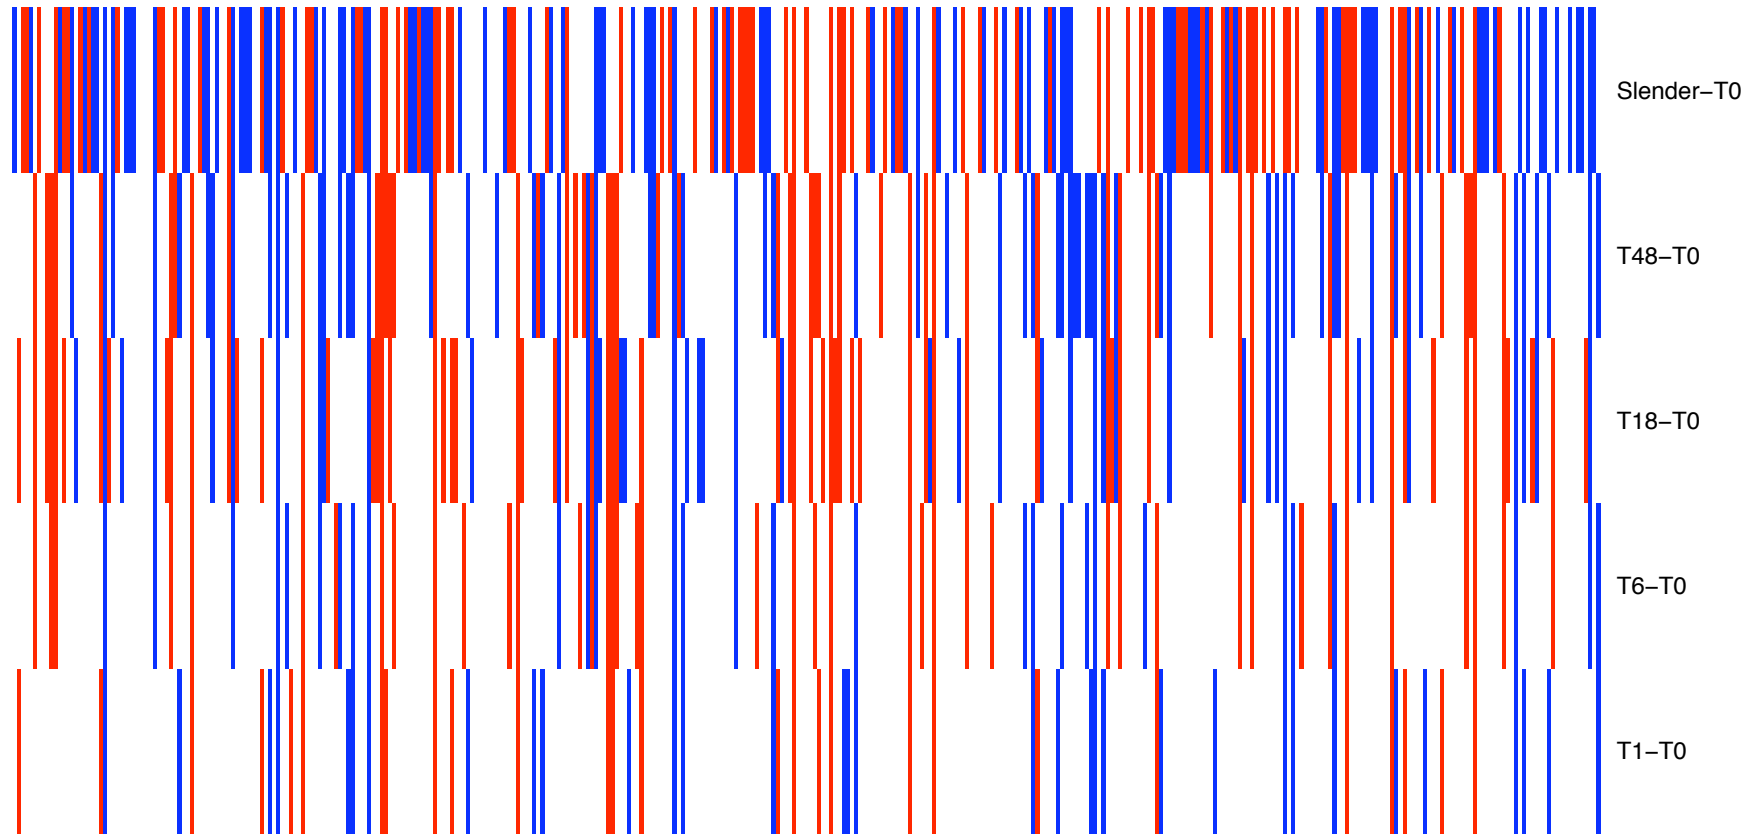

Supplement: 1471-2164-10-427-S9.pdf [file 1471-2164-10-427-S9.pdf]
